# Supplementary material for: Pharmacist-led primary care interventions to promote medicines optimisation and reduce overprescribing: a systematic review of UK studies and initiatives
Source: HighWire-hosted journal article supplement (doi:10.1136/bmjopen-2023-081934), 2024-08-01
Supplement: bmjopen-2023-081934supp003_data_supplement.pdf [file bmjopen-2023-081934supp003_data_supplement.pdf]

## MMAT quality assessment results

| Reference         | Screening questions                                                                                                                                          | Type of study               | MMAT questions and answers                                                                                                                                                                                                                                                                                                                                                                                                                                                                                                                                                                                                                                                                     |
|-------------------|--------------------------------------------------------------------------------------------------------------------------------------------------------------|-----------------------------|------------------------------------------------------------------------------------------------------------------------------------------------------------------------------------------------------------------------------------------------------------------------------------------------------------------------------------------------------------------------------------------------------------------------------------------------------------------------------------------------------------------------------------------------------------------------------------------------------------------------------------------------------------------------------------------------|
| Alharthi 2023[18] | <p><b>S1. Are there clear research questions?</b> <i>Yes</i></p> <p><b>S2. Do the collected data allow to address the research questions?</b> <i>Yes</i></p> | Qualitative                 | <p><b>1.1. Is the qualitative approach appropriate to answer the research question?</b> <i>Yes (identifying perceived barriers and facilitators)</i></p> <p><b>1.2. Are the qualitative data collection methods adequate to address the research question?</b> <i>Can't tell (secondary analysis of existing data)</i></p> <p><b>1.3. Are the findings adequately derived from the data?</b> <i>Yes</i></p> <p><b>1.4. Is the interpretation of results sufficiently substantiated by data?</b> <i>Yes</i></p> <p><b>1.5. Is there coherence between qualitative data sources, collection, analysis and interpretation?</b> <i>Yes (supported by use of Theoretical Domains Framework)</i></p> |
| Alves 2019[19]    | <p><b>S1. Are there clear research questions?</b> <i>Yes</i></p> <p><b>S2. Do the collected data allow to address the research questions?</b> <i>Yes</i></p> | Quantitative non-randomised | <p><b>3.1. Are the participants representative of the target population?</b> <i>Yes (care home residents)</i></p> <p><b>3.2. Are measurements appropriate regarding both the outcome and intervention (or exposure)?</b> <i>Yes</i></p> <p><b>3.3. Are there complete outcome data?</b> <i>Can't tell (partial data presented)</i></p> <p><b>3.4. Are the confounders accounted for in the design and analysis?</b> <i>No (uncontrolled before/after study)</i></p> <p><b>3.5. During the study period, is the intervention administered (or exposure occurred) as intended?</b> <i>Can't tell (fidelity not monitored)</i></p>                                                                |
| Baqir 2017[20]    | <p><b>S1. Are there clear research questions?</b> <i>Yes</i></p> <p><b>S2. Do the collected data allow to address the research questions?</b> <i>Yes</i></p> | Quantitative non-randomised | <p><b>3.1. Are the participants representative of the target population?</b> <i>Yes (care home residents)</i></p> <p><b>3.2. Are measurements appropriate regarding both the outcome and intervention (or exposure)?</b> <i>Yes</i></p> <p><b>3.3. Are there complete outcome data?</b> <i>Yes (all specified outcomes reported)</i></p> <p><b>3.4. Are the confounders accounted for in the design and analysis?</b> <i>No (uncontrolled before/after study)</i></p> <p><b>3.5. During the study period, is the intervention administered (or exposure occurred) as intended?</b> <i>Can't tell (interventions not externally validated)</i></p>                                              |

|                   |                                                                                                                                                              |                          |                                                                                                                                                                                                                                                                                                                                                                                                                                                                                                                                                                                                                                                                                                                                                                                                                                         |
|-------------------|--------------------------------------------------------------------------------------------------------------------------------------------------------------|--------------------------|-----------------------------------------------------------------------------------------------------------------------------------------------------------------------------------------------------------------------------------------------------------------------------------------------------------------------------------------------------------------------------------------------------------------------------------------------------------------------------------------------------------------------------------------------------------------------------------------------------------------------------------------------------------------------------------------------------------------------------------------------------------------------------------------------------------------------------------------|
| Birt 2021[21]     | <p><b>S1. Are there clear research questions?</b> <i>Yes</i></p> <p><b>S2. Do the collected data allow to address the research questions?</b> <i>Yes</i></p> | Mixed methods            | <p><b>5.1. Is there an adequate rationale for using a mixed methods design to address the research question?</b> <i>Yes (qualitative and quantitative data relevant to process evaluation)</i></p> <p><b>5.2. Are the different components of the study effectively integrated to answer the research question?</b> <i>Yes (integrated in results and discussion)</i></p> <p><b>5.3. Are the outputs of the integration of qualitative and quantitative components adequately interpreted?</b> <i>Yes (see discussion)</i></p> <p><b>5.4. Are divergences and inconsistencies between quantitative and qualitative results adequately addressed?</b> <i>Yes (page 11 column 2)</i></p> <p><b>5.5. Do the different components of the study adhere to the quality criteria of each tradition of the methods involved?</b> <i>Yes</i></p> |
| Howard 2014[11]   | <p><b>S1. Are there clear research questions?</b> <i>Yes</i></p> <p><b>S2. Do the collected data allow to address the research questions?</b> <i>Yes</i></p> | Quantitative descriptive | <p><b>4.1. Is the sampling strategy relevant to address the research question?</b> <i>Yes</i></p> <p><b>4.2. Is the sample representative of the target population?</b> <i>Yes (all interventions recorded)</i></p> <p><b>4.3. Are the measurements appropriate?</b> <i>Yes</i></p> <p><b>4.4. Is the risk of nonresponse bias low?</b> <i>Yes (data from intervention arm only)</i></p> <p><b>4.5. Is the statistical analysis appropriate to answer the research question?</b> <i>Yes</i></p>                                                                                                                                                                                                                                                                                                                                         |
| Jeffries 2017[13] | <p><b>S1. Are there clear research questions?</b> <i>Yes</i></p> <p><b>S2. Do the collected data allow to address the research questions?</b> <i>Yes</i></p> | Qualitative              | <p><b>1.1. Is the qualitative approach appropriate to answer the research question?</b> <i>Yes (explored factors perceived to affect adoption and implementation)</i></p> <p><b>1.2. Are the qualitative data collection methods adequate to address the research question?</b> <i>Yes (interviews and focus groups)</i></p> <p><b>1.3. Are the findings adequately derived from the data?</b> <i>Yes (context-mechanism-outcome groups identified)</i></p> <p><b>1.4. Is the interpretation of results sufficiently substantiated by data?</b> <i>Yes</i></p> <p><b>1.5. Is there coherence between qualitative data sources, collection, analysis and interpretation?</b> <i>Yes (supported by use of realist analysis)</i></p>                                                                                                       |
| Jeffries 2018[12] | <p><b>S1. Are there clear research questions?</b> <i>Yes</i></p>                                                                                             | Qualitative              | <p><b>1.1. Is the qualitative approach appropriate to answer the research question?</b> <i>Yes (explored factors perceived to affect adoption and implementation)</i></p>                                                                                                                                                                                                                                                                                                                                                                                                                                                                                                                                                                                                                                                               |

|                 |                                                                                                                                                       |                             |                                                                                                                                                                                                                                                                                                                                                                                                                                                                                                                                                                                                                                                                                                                               |
|-----------------|-------------------------------------------------------------------------------------------------------------------------------------------------------|-----------------------------|-------------------------------------------------------------------------------------------------------------------------------------------------------------------------------------------------------------------------------------------------------------------------------------------------------------------------------------------------------------------------------------------------------------------------------------------------------------------------------------------------------------------------------------------------------------------------------------------------------------------------------------------------------------------------------------------------------------------------------|
|                 | <b>S2. Do the collected data allow to address the research questions?</b> <i>Yes</i>                                                                  |                             | <b>1.2. Are the qualitative data collection methods adequate to address the research question?</b> <i>Yes (interviews)</i><br><b>1.3. Are the findings adequately derived from the data?</b> <i>Yes</i><br><b>1.4. Is the interpretation of results sufficiently substantiated by data?</b> <i>Yes (supported by relevant quotes)</i><br><b>1.5. Is there coherence between qualitative data sources, collection, analysis and interpretation?</b> <i>Yes (supported by use of Normalisation Process Theory)</i>                                                                                                                                                                                                              |
| Lane 2020[22]   | <b>S1. Are there clear research questions?</b> <i>Yes</i><br><br><b>S2. Do the collected data allow to address the research questions?</b> <i>Yes</i> | Qualitative                 | <b>1.1. Is the qualitative approach appropriate to answer the research question?</b> <i>Yes (gather opinions about proposed service)</i><br><b>1.2. Are the qualitative data collection methods adequate to address the research question?</b> <i>Yes (focus groups and interviews with different staff groups at different sites)</i><br><b>1.3. Are the findings adequately derived from the data?</b> <i>Yes</i><br><b>1.4. Is the interpretation of results sufficiently substantiated by data?</b> <i>Yes (supported by relevant quotes)</i><br><b>1.5. Is there coherence between qualitative data sources, collection, analysis and interpretation?</b> <i>Yes (supported by use of Theoretical Domains Framework)</i> |
| Madden 2022[14] | <b>S1. Are there clear research questions?</b> <i>Yes</i><br><br><b>S2. Do the collected data allow to address the research questions?</b> <i>Yes</i> | Qualitative                 | <b>1.1. Is the qualitative approach appropriate to answer the research question?</b> <i>Yes (pharmacists' experience of SMR implementation)</i><br><b>1.2. Are the qualitative data collection methods adequate to address the research question?</b> <i>Yes (interviews with newly employed and established pharmacists)</i><br><b>1.3. Are the findings adequately derived from the data?</b> <i>Yes</i><br><b>1.4. Is the interpretation of results sufficiently substantiated by data?</b> <i>Yes (supported by relevant quotes)</i><br><b>1.5. Is there coherence between qualitative data sources, collection, analysis and interpretation?</b> <i>Yes (supported by thematic analysis)</i>                             |
| Peek 2020[15]   | <b>S1. Are there clear research questions?</b> <i>Yes</i>                                                                                             | Quantitative non-randomised | <b>3.1. Are the participants representative of the target population?</b> <i>Yes (general practices and their patients)</i><br><b>3.2. Are measurements appropriate regarding both the outcome and intervention (or exposure)?</b> <i>Can't tell (for intervention)</i>                                                                                                                                                                                                                                                                                                                                                                                                                                                       |

|                  |                                                                                                                                                       |                                          |                                                                                                                                                                                                                                                                                                                                                                                                                                                                                                                                                                                                                                                                                                 |
|------------------|-------------------------------------------------------------------------------------------------------------------------------------------------------|------------------------------------------|-------------------------------------------------------------------------------------------------------------------------------------------------------------------------------------------------------------------------------------------------------------------------------------------------------------------------------------------------------------------------------------------------------------------------------------------------------------------------------------------------------------------------------------------------------------------------------------------------------------------------------------------------------------------------------------------------|
|                  | <b>S2. Do the collected data allow to address the research questions?</b> <i>Yes</i>                                                                  |                                          | <b>3.3. Are there complete outcome data?</b> <i>Yes</i><br><b>3.4. Are the confounders accounted for in the design and analysis?</b> <i>No (small risk of unmeasured confounding)</i><br><b>3.5. During the study period, is the intervention administered (or exposure occurred) as intended?</b> <i>Can't tell (interventions not externally validated)</i>                                                                                                                                                                                                                                                                                                                                   |
| Rodgers 2022[16] | <b>S1. Are there clear research questions?</b> <i>Yes</i><br><br><b>S2. Do the collected data allow to address the research questions?</b> <i>Yes</i> | Quantitative non-randomised              | <b>3.1. Are the participants representative of the target population?</b> <i>Yes (general practices and their patients)</i><br><b>3.2. Are measurements appropriate regarding both the outcome and intervention (or exposure)?</b> <i>Can't tell (for intervention)</i><br><b>3.3. Are there complete outcome data?</b> <i>No (6- and 12-month data not collected from all practices)</i><br><b>3.4. Are the confounders accounted for in the design and analysis?</b> <i>No (small risk of unmeasured confounding)</i><br><b>3.5. During the study period, is the intervention administered (or exposure occurred) as intended?</b> <i>Can't tell (interventions not externally validated)</i> |
| Syafhan 2021[17] | <b>S1. Are there clear research questions?</b> <i>Yes</i><br><br><b>S2. Do the collected data allow to address the research questions?</b> <i>Yes</i> | Quantitative randomised controlled trial | <b>2.1. Is randomisation appropriately performed?</b> <i>Can't tell (method of randomisation not reported)</i><br><b>2.2. Are the groups comparable at baseline?</b> <i>Yes</i><br><b>2.3. Are there complete outcome data?</b> <i>No (30% lost to follow-up or withdrew)</i><br><b>2.4. Are outcome assessors blinded to the intervention provided?</b> <i>Can't tell (outcome data from GP electronic records)</i><br><b>2.5. Did the participants adhere to the assigned intervention?</b> <i>No (30% lost to follow-up or withdrew)</i>                                                                                                                                                     |
| Thayer 2021[23]  | <b>S1. Are there clear research questions?</b> <i>Yes</i><br><br><b>S2. Do the collected data allow to address the research questions?</b> <i>Yes</i> | Quantitative non-randomised              | <b>3.1. Are the participants representative of the target population?</b> <i>Yes (care home residents with intellectual disabilities)</i><br><b>3.2. Are measurements appropriate regarding both the outcome and intervention (or exposure)?</b> <i>Yes (details recorded for each review and associated outcomes)</i><br><b>3.3. Are there complete outcome data?</b> <i>Yes (all specified outcomes reported)</i><br><b>3.4. Are the confounders accounted for in the design and analysis?</b> <i>No (uncontrolled before/after study)</i>                                                                                                                                                    |

|                |                                                                                                                                                       |                             |                                                                                                                                                                                                                                                                                                                                                                                                                                                                                                                                                                                                                                                                                                                                                          |
|----------------|-------------------------------------------------------------------------------------------------------------------------------------------------------|-----------------------------|----------------------------------------------------------------------------------------------------------------------------------------------------------------------------------------------------------------------------------------------------------------------------------------------------------------------------------------------------------------------------------------------------------------------------------------------------------------------------------------------------------------------------------------------------------------------------------------------------------------------------------------------------------------------------------------------------------------------------------------------------------|
|                |                                                                                                                                                       |                             | <b>3.5. During the study period, is the intervention administered (or exposure occurred) as intended?</b> <i>Yes (one-off review mainly based on records)</i>                                                                                                                                                                                                                                                                                                                                                                                                                                                                                                                                                                                            |
| Twigg 2015[24] | <b>S1. Are there clear research questions?</b> <i>Yes</i><br><br><b>S2. Do the collected data allow to address the research questions?</b> <i>Yes</i> | Quantitative non-randomised | <b>3.1. Are the participants representative of the target population?</b> <i>Can't tell (no indication of attempts to recruit a representative sample)</i><br><b>3.2. Are measurements appropriate regarding both the outcome and intervention (or exposure)?</b> <i>Yes (details recorded for intervention components and associated outcomes)</i><br><b>3.3. Are there complete outcome data?</b> <i>Can't tell (limited response for resource use outcomes)</i><br><b>3.4. Are the confounders accounted for in the design and analysis?</b> <i>No (uncontrolled before/after study)</i><br><b>3.5. During the study period, is the intervention administered (or exposure occurred) as intended?</b> <i>Can't tell (approx. 30% withdrawal rate)</i> |
